# Supplementary material for: Transfer-printing of patterned PEDOT:PSS structures for bendable, stretchable and biodegradable electronics
Source: Royal Society of Chemistry journal article supplement (doi:10.1039/d3tc04485h), 2024-01-01
Supplement: d3tc04485h1.pdf [file d3tc04485h1.pdf]

## Supplementary Information:

### Transfer-printing of patterned PEDOT:PSS structures for bendable, stretchable and biodegradable electronics

Carla Volkert<sup>1\*</sup>, Renan Colucci<sup>1</sup>, Rüdiger Berger<sup>2</sup>, Pol Besenius<sup>3</sup>, Paul W. M. Blom<sup>4</sup>, Ulrike Kraft<sup>1\*</sup>

<sup>1</sup>Organic Bioelectronics Research Group, Max Planck Institute for Polymer Research, 55128 Mainz, Germany

<sup>2</sup>Department of Physics of Interfaces, Max Planck Institute for Polymer Research, Mainz, Germany

<sup>3</sup>Department of Chemistry, Johannes Gutenberg Universität Mainz, 55128 Mainz, Germany

<sup>4</sup>Department of Molecular Electronics, Max Planck Institute for Polymer Research, 55128 Mainz, Germany

Email: volkerc@mpip-mainz.mpg.de, kraftu@mpip-mainz.mpg.de

- 1) Literature overview
- 2) Electrical characterization
- 3) Transmission measurements
- 4) Mask layout and detailed margins of patterned and transfer-printed PEDOT:PSS thin films

Additional material: Video demonstrating the lift-off process.

## 1. Literature overview

Table S1: Comparative overview of different transfer methods onto flexible and stretchable substrates, including details on the donating substrate, required treatment, receiving substrate, limitations on PEDOT:PSS formulation, and, if applicable, the dimensions of structured PEDOT:PSS that can be transferred.

| reference | donating substrate | required treatment                        |                                          | receiving substrate | PEDOT:PSS formulation limited? | structures transferred?                       | conductivity maintained after transfer? |
|-----------|--------------------|-------------------------------------------|------------------------------------------|---------------------|--------------------------------|-----------------------------------------------|-----------------------------------------|
|           |                    | decrease adhesion from donating substrate | increase adhesion to receiving substrate |                     |                                |                                               |                                         |
| 2         | glass              | acid soaking or dipping treatments        |                                          | PDMS                | yes                            | no                                            | almost identical                        |
| 14        | glass              | acid treatment                            | PEDOT:PSS/d-sorbitol layer on top of PET | PET                 | yes                            | no                                            | not explicitly given                    |
| 16        | glass              |                                           | chemically tailored PDMS                 | APTES-PDMS          | unknown                        | yes; no exact margins given, approx. mm-scale | increased                               |
| 17        | glass              | acid treatment                            |                                          | PDMS                | yes                            | yes; margins not given                        | almost identical                        |
| 20        | glass              | surfactant DBSA                           |                                          | poly (lactic) acid  | yes                            | yes; 500 $\mu\text{m}$                        | decrease                                |
| this work | glass              | none                                      | none                                     | PVA: glycerol       | no                             | yes $\geq 50 \mu\text{m}$                     | almost identical/increase               |

- 2 X. Fan, B. Xu, S. Liu, C. Cui, J. Wang and F. Yan, *ACS Appl. Mater. Interfaces*, 2016, 8, 14029–14036.
- 14 X. Fan, W. Song, T. Lei, B. Xu, F. Yan, N. Wang, H. Cui and Z. Ge, *Mater. Chem. Front.*, 2019, 3, 901–908.
- 16 Z. Rao, A. Thukral, P. Yang, Y. Lu, H. Shim, W. Wu, A. Karim and C. Yu, *Adv. Funct. Mater.*, 2022, 32, 2111232.
- 17 N. Kim, H. Kang, J. H. Lee, S. Kee, S. H. Lee and K. Lee, *Adv. Mater.*, 2015, 27, 2317–2323.
- 20 S. Zhang, H. Ling, Y. Chen, Q. Cui, J. Ni, X. Wang, M. C. Hartel, X. Meng, K. J. Lee, J. Lee, W. Sun, H. Lin, S. Emaminejad, S. Ahadian, N. Ashammakhi, M. R. Dokmeci and A. Khademhosseini, *Adv. Funct. Mater.*, 2020, 30, 1906016.

## 2. Electrical characterization

Table S2: Film thickness, resistance and conductivity values for variously treated PEDOT:PSS thin films before and after transfer-printing and O<sub>2</sub>-plasma etching, respectively. All films were spin-coated speed at 1000 rpm for 60 s.

*Please note that all resistance values were recorded for the exact same thin film before and after printing or O<sub>2</sub>-plasma etching, respectively.*

|                                |             | PRINTING        |                    |                                    |                    | O <sub>2</sub> -PLASMA |                    |                |                    |
|--------------------------------|-------------|-----------------|--------------------|------------------------------------|--------------------|------------------------|--------------------|----------------|--------------------|
|                                |             | before on glass |                    | after on PVA:<br>glycerol (25 wt%) |                    | before on glass        |                    | after on glass |                    |
|                                | $d$<br>[nm] | $R$<br>[Ohm]    | $\sigma$<br>[S/cm] | $R$<br>[Ohm]                       | $\sigma$<br>[S/cm] | $R$<br>[Ohm]           | $\sigma$<br>[S/cm] | $R$<br>[Ohm]   | $\sigma$<br>[S/cm] |
| pristine                       | 74          | 338 k           | 0.5                | 205k                               | 0.8                | 459 k                  | 0.3                | 757 k          | 0.2                |
| DMSO                           | 55          | 130             | 1600               | 125                                | 1655               | 138                    | 1500               | 169            | 1225               |
| H <sub>2</sub> SO <sub>4</sub> | 28          | 147             | 2808               | 139                                | 2976               | 2.6                    | 1496               | 284            | 1453               |
| DBSA/ EG                       | 60          | 239             | 797                | 206                                | 927                | 257                    | 742                | 556            | 342                |
| MeSO <sub>3</sub> H            | 63          | 136             | 1348               | 98                                 | 1860               | 78                     | 1939               | 99             | 1527               |

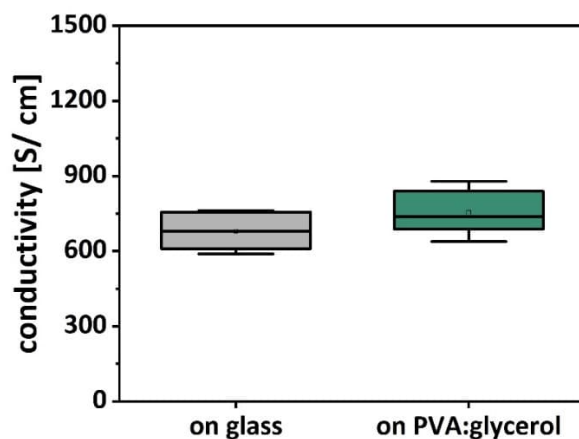

Figure S1: Conductivity values for multiple DBSA/EG treated PEDOT:PSS thin films before (on glass) and after transfer-printing (on PVA:glycerol).

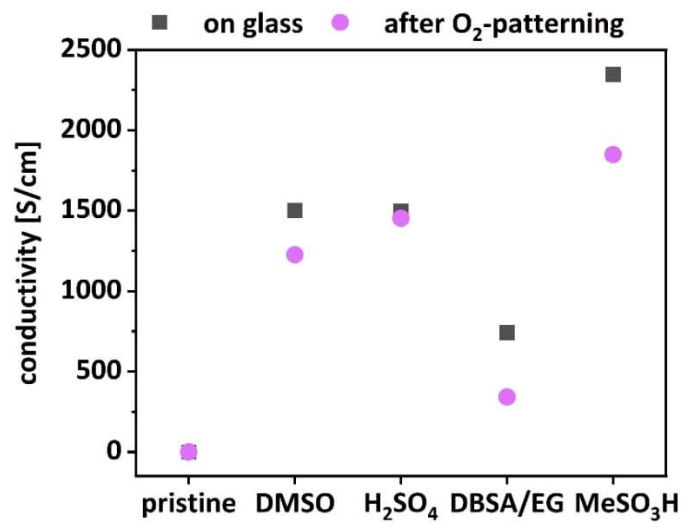

Figure S2: Effect of O<sub>2</sub>-patterning on the conductivity of PEDOT:PSS films.

### 3. Transmission measurements

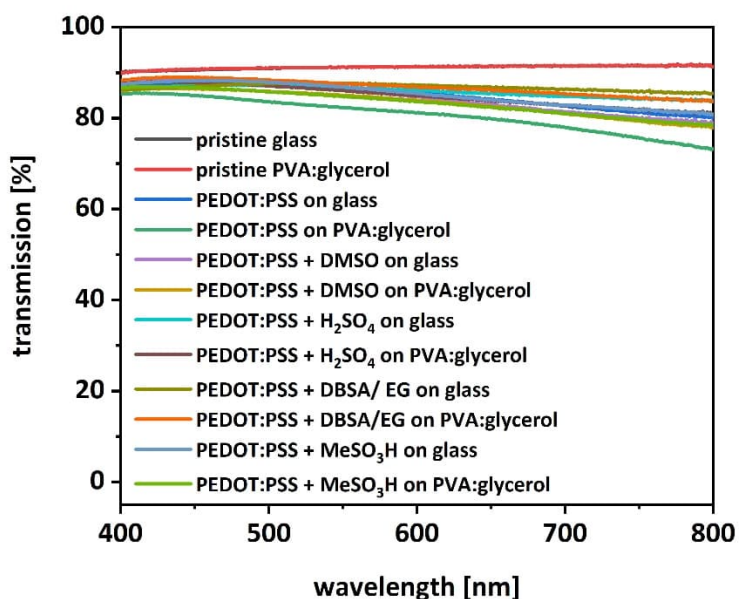

Figure S3: Transmission spectra of pristine glass and PVA/glycerol (25 wt%) substrates, as well as variously treated PEDOT:PSS films on glass or transfer-printed on PVA substrates, respectively.

Table S3: Transmission at  $\lambda = 550$  nm of pristine glass and PVA:glycerol (25 wt%) substrates, as well as variously treated PEDOT:PSS on top of glass or transfer-printed, respectively.

|                                | transmission [%] |      |                                |          |                     |
|--------------------------------|------------------|------|--------------------------------|----------|---------------------|
| pristine glass                 | 91.3             |      |                                |          |                     |
| pristine pva:glycerol (25 wt%) | 91.3             |      |                                |          |                     |
| PEDOT:PSS                      | pristine         | DMSO | H <sub>2</sub> SO <sub>4</sub> | DBSA/ EG | MeSO <sub>3</sub> H |
| on glass                       | 85.1             | 86.4 | 86.8                           | 87.6     | 86.9                |
| on pva:glycerol (25 wt%)       | 86.3             | 85   | 86                             | 87.6     | 84.7                |

4. Mask layout and detailed margins of patterned and transfer-printed PEDOT:PSS thin films

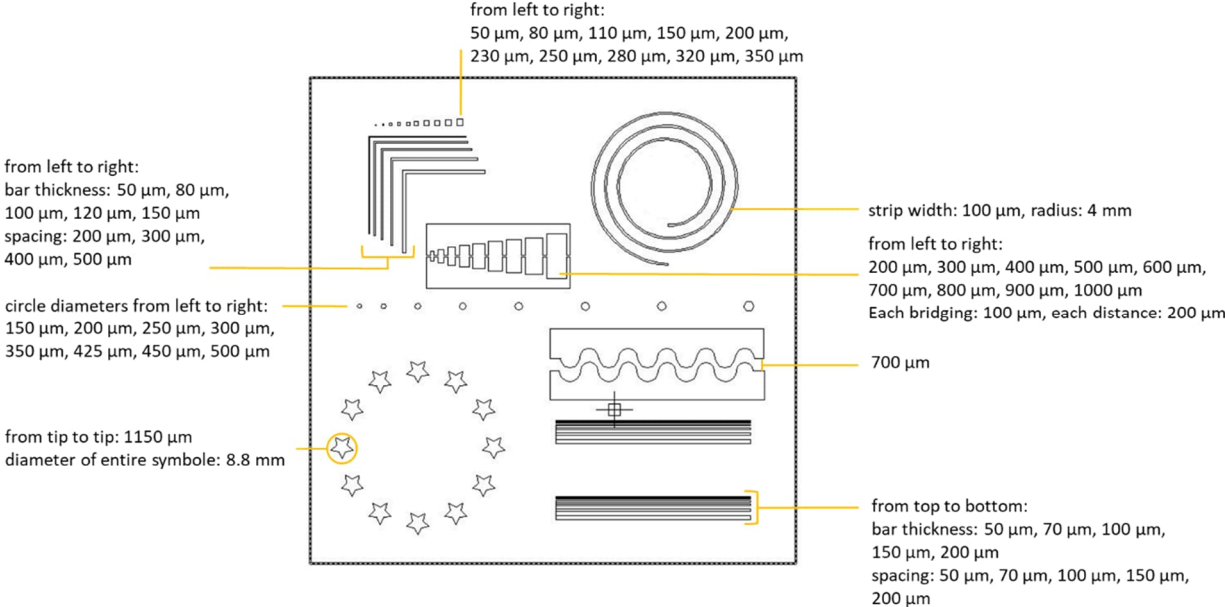

Figure S4: Mask layout for patterning PEDOT:PSS, including all margins.

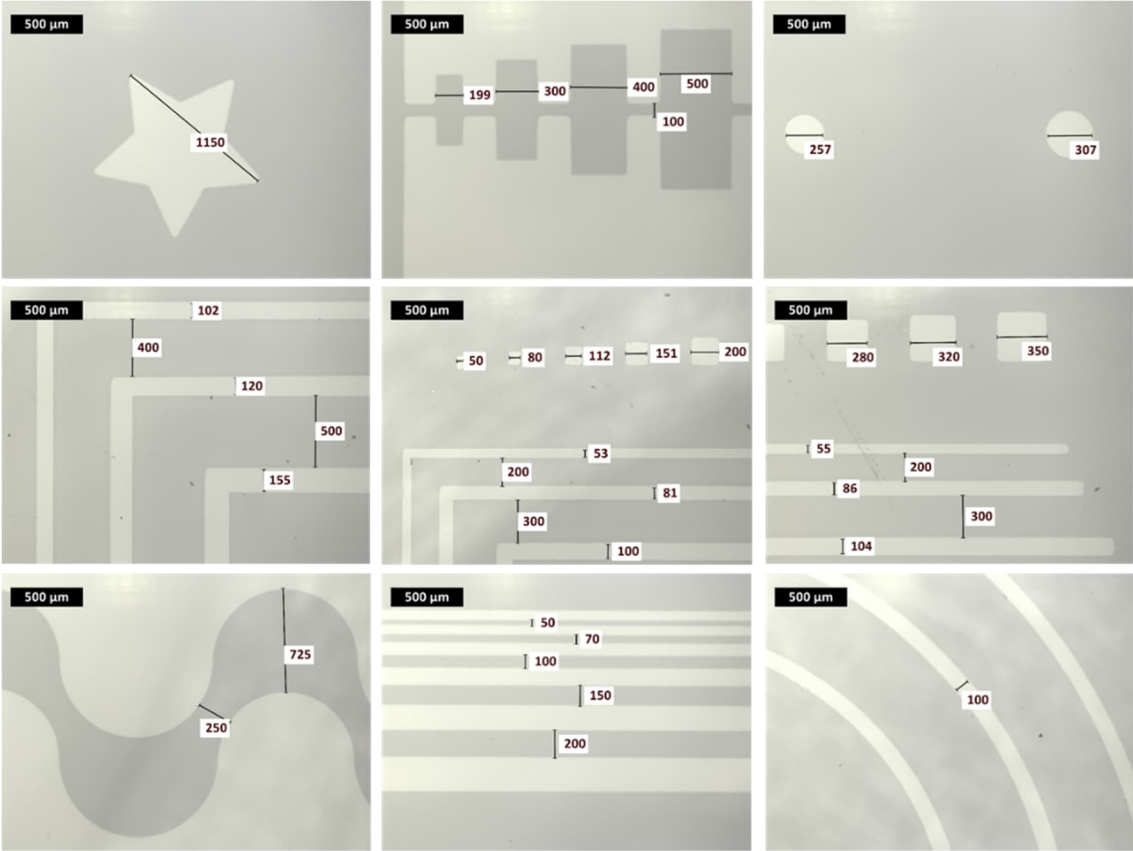

Figure S5: Detailed margins of O<sub>2</sub>-patterned PEDOT:PSS.

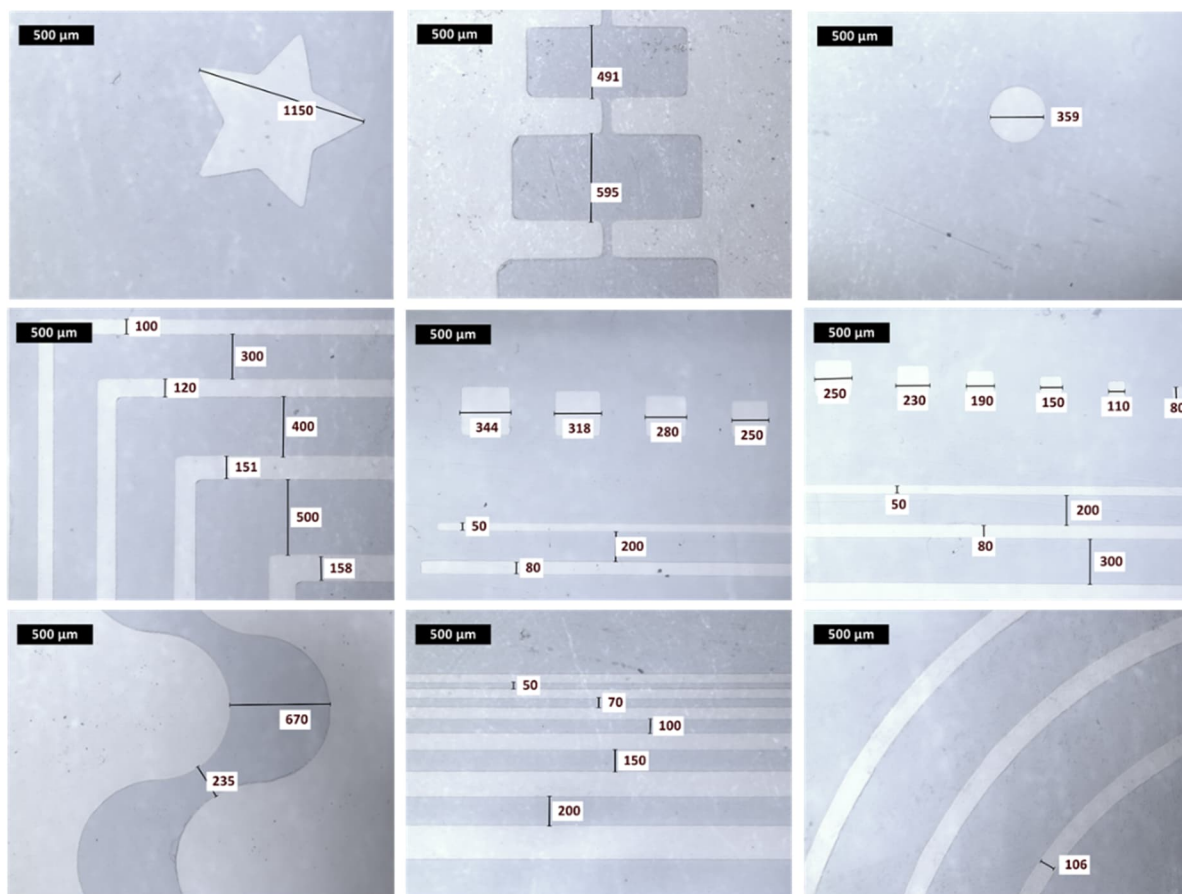

Figure S6: Detailed margins of O<sub>2</sub>-patterned and subsequently transfer-printed PEDOT:PSS on PVA:glycerol (25 wt%) substrates.

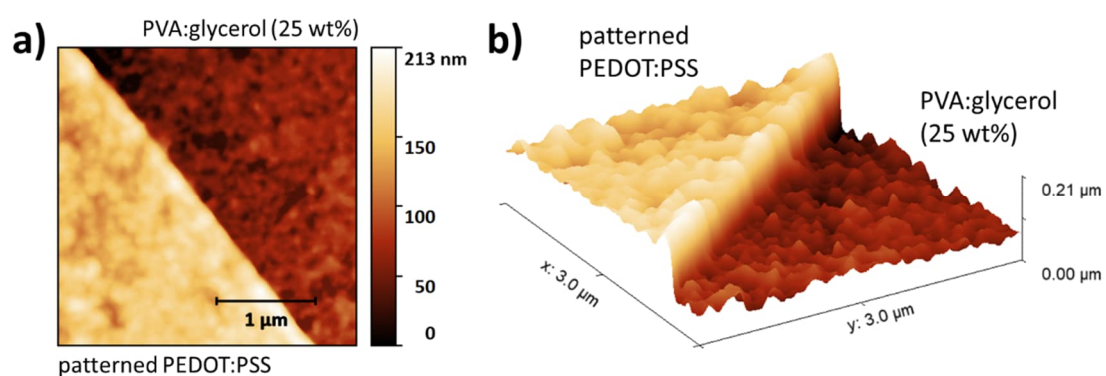

Figure S7: Scanning Force Microscopy recordings (3 μm x 3 μm) of patterned and transfer-printed PEDOT:PSS on PVA:glycerol (25 wt%). a) Topography image and b) 3D representation.
